# Supplementary material for: Patterns of Postpartum Ambulatory Care Follow‐up Care Among Women With Hypertensive Disorders of Pregnancy
Source: PubMed Central journal article supplement — J Am Heart Assoc. 2020 Aug 27;9(17):e016357. doi: 10.1161/JAHA.120.016357 (PMC7660757; doi:10.1161/jaha.120.016357), 2020-08-27
Supplement: JAH3-9-e016357-s001.pdf [file JAH3-9-e016357-s001.pdf]

# **SUPPLEMENTAL MATERIAL**

**Table S1. Claims-based definitions of covariates and outcomes.**

| <b>Exposures</b>                                    |                                                                                                                                                                                                                                                                                                                                                                                                                                                                                                                                                                                                                                         |
|-----------------------------------------------------|-----------------------------------------------------------------------------------------------------------------------------------------------------------------------------------------------------------------------------------------------------------------------------------------------------------------------------------------------------------------------------------------------------------------------------------------------------------------------------------------------------------------------------------------------------------------------------------------------------------------------------------------|
| Chronic HTN                                         | ≥ 1 inpatient or outpatient ICD-9 code for chronic hypertension (642.0x, 642.1x, 642.2x, 401.x, 402.x, 403.x, 404.x, 405.x) during pregnancy (LMP to delivery date) or the 180-day baseline period prior to LMP. We excluded patients with any code for HDP.                                                                                                                                                                                                                                                                                                                                                                            |
| Hypertensive disorder of pregnancy                  | ≥ 1 inpatient or outpatient code ICD-9 code during pregnancy (LMP to delivery date)                                                                                                                                                                                                                                                                                                                                                                                                                                                                                                                                                     |
| Gestational HTN                                     | ICD-9-CM code 642.3x                                                                                                                                                                                                                                                                                                                                                                                                                                                                                                                                                                                                                    |
| Non-severe preeclampsia                             | ICD-9-CM code 642.4x                                                                                                                                                                                                                                                                                                                                                                                                                                                                                                                                                                                                                    |
| Severe preeclampsia/eclampsia                       | ICD-9-CM codes 642.5x, 642.6x                                                                                                                                                                                                                                                                                                                                                                                                                                                                                                                                                                                                           |
| Chronic hypertension with superimposed preeclampsia | ICD-9-CM code 642.7x                                                                                                                                                                                                                                                                                                                                                                                                                                                                                                                                                                                                                    |
| <b>Outcomes</b>                                     |                                                                                                                                                                                                                                                                                                                                                                                                                                                                                                                                                                                                                                         |
| Postpartum primary care visit                       | <ol style="list-style-type: none"> <li>1. Any claim containing following CPT codes: 99201-99205, 99211-99215, 99024, 99241-99245, 99381-99387, 99384, 99394, and</li> <li>2. A specialty code corresponding to any primary care or cardiology provider.</li> </ol> <p>We excluded specialty codes corresponding to family practice providers as these visits were counted as OB.</p>                                                                                                                                                                                                                                                    |
| Postpartum OB visit                                 | <ol style="list-style-type: none"> <li>1. Place of service (POS) is office (POS=11) or outpatient hospital (POS=22) setting, and</li> <li>2. Type of service is professional office visit, and</li> </ol> <p>One of the following:</p> <ol style="list-style-type: none"> <li>3. A specialty code corresponding to any obstetrics provider, including obstetrics &amp; gynecology, maternal and fetal medicine, certified nurse midwife, or</li> <li>4. ≥ 1 claim with V24.1 or V24.2 billing code</li> <li>5. Any claim with CPT code for outpatient visit and a specialty code corresponding to a family practice provider</li> </ol> |

**Table S2. Postpartum ambulatory care follow-up by provider type and time since delivery among women with and without hypertensive disorders with continuous enrollment  $\geq$  12 months after delivery.**

|                       | <b>Normotensive<br/>controls<br/>(n=366,609)</b> | <b>HDP<br/>(n=51,533)</b> | <b>P value*</b> | <b>Chronic HTN<br/>(n=15,861)</b> | <b>P value*</b> |
|-----------------------|--------------------------------------------------|---------------------------|-----------------|-----------------------------------|-----------------|
| <b>Primary care</b>   |                                                  |                           |                 |                                   |                 |
| 6 Months              | 49,954 (13)                                      | 9,409 (18)                | < .0001         | 3,476 (22)                        |                 |
| 12 Months             | 78,564 (20)                                      | 13,368 (30)               | < .0001         | 4,889 (31)                        | < .0001         |
| <b>Women's health</b> |                                                  |                           |                 |                                   |                 |
| 6 Months              | 154,407 (39)                                     | 24,919 (48)               | < .0001         | 7,600 (48)                        |                 |
| 12 Months             | 220,365 (56)                                     | 33,140 (64)               | < .0001         | 10,122 (64)                       | < .0001         |
| <b>Any provider</b>   |                                                  |                           |                 |                                   |                 |
| 6 Months              | 185,092 (47)                                     | 29,981 (58)               | < .0001         | 9,560 (60)                        |                 |
| 12 Months             | 256,400 (65)                                     | 38,337 (74)               | < .0001         | 12,137 (77)                       | < .0001         |

All values represent number (%)

\*Compared to normotensive controls

HDP, hypertensive disorders of pregnancy; HTN, hypertension
